# Supplementary material for: Physicochemical properties of green solvents derived from biomass
Source: Royal Society of Chemistry journal article supplement (doi:10.1039/c0gc00853b), 2011-01-01
Supplement: c0gc00853b.pdf [file c0gc00853b.pdf]

## SUPPLEMENTARY MATERIAL

**Table 1.** Experimental density data,  $\rho$ , of studied green solvents.

| $T(K)$ | $\rho(g \cdot cm^{-3})$ |                  |                |                  |                  |
|--------|-------------------------|------------------|----------------|------------------|------------------|
|        | 2-Furfuraldehyde        | Furfuryl alcohol | Levulinic acid | Ethyl levulinate | Butyl Levulinate |
| 278.15 | 1.176049                | 1.148718         |                | 1.027110         | 0.987873         |
| 280.65 | 1.173409                | 1.146433         |                | 1.024670         | 0.985629         |
| 283.15 | 1.170754                | 1.144134         |                | 1.022221         | 0.983384         |
| 285.65 | 1.168099                | 1.141830         |                | 1.019773         | 0.981141         |
| 288.15 | 1.165444                | 1.139525         |                | 1.017326         | 0.978898         |
| 290.65 | 1.162787                | 1.137215         |                | 1.014881         | 0.976656         |
| 293.15 | 1.160128                | 1.134904         |                | 1.012435         | 0.974416         |
| 295.65 | 1.157468                | 1.132589         |                | 1.009988         | 0.972175         |
| 298.15 | 1.154805                | 1.130269         | 1.136056       | 1.007542         | 0.969935         |
| 300.65 | 1.152142                | 1.127945         | 1.133904       | 1.005096         | 0.967697         |
| 303.15 | 1.149478                | 1.125616         | 1.131749       | 1.002649         | 0.965458         |
| 305.65 | 1.146812                | 1.123282         | 1.129599       | 1.000203         | 0.963220         |
| 308.15 | 1.144140                | 1.120942         | 1.127450       | 0.997755         | 0.960980         |
| 310.65 | 1.141470                | 1.118596         | 1.125302       | 0.995308         | 0.958741         |
| 313.15 | 1.138793                | 1.116244         | 1.123155       | 0.992859         | 0.956501         |
| 315.65 | 1.136116                | 1.113884         | 1.121008       | 0.990410         | 0.954260         |
| 318.15 | 1.133433                | 1.111518         | 1.118864       | 0.987957         | 0.952019         |
| 320.65 | 1.130749                | 1.109146         | 1.116721       | 0.985507         | 0.949778         |
| 323.15 | 1.128061                | 1.106765         | 1.114578       | 0.983053         | 0.947536         |
| 325.65 | 1.125369                | 1.104377         | 1.112433       | 0.980599         | 0.945294         |
| 328.15 | 1.122673                | 1.101981         | 1.110291       | 0.978142         | 0.943050         |
| 330.65 | 1.119975                | 1.099577         | 1.108154       | 0.975685         | 0.940805         |
| 333.15 | 1.117271                | 1.097164         | 1.106013       | 0.973224         | 0.938559         |
| 335.65 | 1.114563                | 1.094745         | 1.103874       | 0.970758         | 0.936311         |

338.15                      1.111852                      1.092317                      1.101736                      0.968297                      0.934063

**Table 2.** Experimental data of refractive index,  $n_D$ , of studied green solvents.

| $T(K)$ | $n_D$            |                  |                |                  |                  |
|--------|------------------|------------------|----------------|------------------|------------------|
|        | 2-Furfuraldehyde | Furfuryl alcohol | Levulinic acid | Ethyl levulinate | Butyl Levulinate |
| 283.15 | 1.531332         | 1.492233         |                | 1.426073         | 1.432473         |
| 285.65 | 1.530039         | 1.491207         |                | 1.424990         | 1.431481         |
| 288.15 | 1.528750         | 1.490146         |                | 1.423934         | 1.430489         |
| 290.65 | 1.527440         | 1.489111         |                | 1.422862         | 1.429395         |
| 293.15 | 1.526168         | 1.488085         |                | 1.421790         | 1.428364         |
| 295.65 | 1.524858         | 1.487038         |                | 1.420719         | 1.427334         |
| 298.15 | 1.523577         | 1.486003         | 1.439701       | 1.419656         | 1.426295         |
| 300.65 | 1.522257         | 1.484940         | 1.438858       | 1.418586         | 1.425273         |
| 303.15 | 1.520969         | 1.483885         | 1.438000       | 1.417501         | 1.424249         |
| 305.65 | 1.519655         | 1.482848         | 1.437157       | 1.416454         | 1.423215         |
| 308.15 | 1.518355         | 1.481786         | 1.436300       | 1.415374         | 1.422179         |
| 310.65 | 1.517032         | 1.480713         | 1.435446       | 1.414430         | 1.421140         |
| 313.15 | 1.515740         | 1.479637         | 1.434591       | 1.413237         | 1.420102         |
| 315.65 | 1.514400         | 1.478566         | 1.433715       | 1.412166         | 1.419073         |
| 318.15 | 1.513114         | 1.477501         | 1.432869       | 1.411096         | 1.418027         |
| 320.65 | 1.511785         | 1.476437         | 1.432010       | 1.410032         | 1.416980         |
| 323.15 | 1.510486         | 1.475339         | 1.431148       | 1.408948         | 1.415963         |
| 325.65 | 1.509156         | 1.474255         | 1.430308       | 1.407874         | 1.414901         |
| 328.15 | 1.507845         | 1.473174         | 1.429388       | 1.406801         | 1.413873         |
| 330.65 | 1.506529         | 1.472093         | 1.428580       | 1.405749         | 1.412836         |
| 333.15 | 1.505203         | 1.470989         | 1.427784       | 1.404664         | 1.411794         |
| 335.65 | 1.503903         | 1.469922         | 1.426846       | 1.403574         | 1.410771         |
| 338.15 | 1.502568         | 1.468827         | 1.426027       | 1.402522         | 1.409724         |

**Table 3.** Calculated molar refraction,  $R_m$  for the studied solvents.

| $T(K)$ | $R_m$            |                  |                |                  |                  |
|--------|------------------|------------------|----------------|------------------|------------------|
|        | 2-Furfuraldehyde | Furfuryl alcohol | Levulinic acid | Ethyl levulinate | Butyl Levulinate |
| 283.15 | 25.289           | 24.7861          |                | 35.976           | 45.261           |
| 285.65 | 25.294           | 24.791           |                | 35.981           | 45.273           |
| 288.15 | 25.300           | 24.796           |                | 35.986           | 45.285           |
| 290.65 | 25.305           | 24.801           |                | 35.995           | 45.288           |
| 293.15 | 25.312           | 24.807           |                | 36.002           | 45.297           |
| 295.65 | 25.317           | 24.812           |                | 36.008           | 45.305           |
| 298.15 | 25.323           | 24.817           | 26.821         | 36.015           | 45.313           |
| 300.65 | 25.327           | 24.822           | 26.827         | 36.022           | 45.322           |
| 303.15 | 25.333           | 24.826           | 26.832         | 36.027           | 45.331           |
| 305.65 | 25.338           | 24.832           | 26.838         | 36.035           | 45.339           |
| 308.15 | 25.343           | 24.837           | 26.845         | 36.041           | 45.347           |
| 310.65 | 25.348           | 24.841           | 26.848         | 36.057           | 45.354           |
| 313.15 | 25.353           | 24.845           | 26.853         | 36.053           | 45.362           |
| 315.65 | 25.357           | 24.850           | 26.857         | 36.060           | 45.370           |
| 318.15 | 25.363           | 24.855           | 26.863         | 36.066           | 45.377           |
| 320.65 | 25.368           | 24.860           | 26.868         | 36.073           | 45.383           |
| 323.15 | 25.373           | 24.864           | 26.872         | 36.079           | 45.393           |
| 325.65 | 25.378           | 24.868           | 26.878         | 36.085           | 45.398           |
| 328.15 | 25.383           | 24.873           | 26.880         | 36.091           | 45.406           |
| 330.65 | 25.388           | 24.878           | 26.887         | 36.099           | 45.414           |
| 333.15 | 25.392           | 24.882           | 26.895         | 36.104           | 45.421           |
| 335.65 | 25.398           | 24.888           | 26.896         | 36.109           | 45.429           |
| 338.15 | 25.403           | 24.893           | 26.900         | 36.117           | 45.436           |

**Table 4.** Experimental speed of sound data,  $u$ , of studied green solvents.

| $T(K)$ | $u (m \cdot s^{-1})$ |                  |                |                  |                  |
|--------|----------------------|------------------|----------------|------------------|------------------|
|        | 2-Furfuraldehyde     | Furfuryl alcohol | Levulinic acid | Ethyl levulinate | Butyl Levulinate |
| 278.15 | 1513.35              | 1515.45          |                | 1427.94          | 1414.34          |
| 280.65 | 1504.37              | 1507.24          |                | 1418.35          | 1405.21          |
| 283.15 | 1495.18              | 1498.95          |                | 1408.68          | 1395.98          |
| 285.65 | 1485.98              | 1490.67          |                | 1398.99          | 1386.76          |
| 288.15 | 1476.80              | 1482.48          |                | 1389.35          | 1377.65          |
| 290.65 | 1467.63              | 1474.26          |                | 1379.77          | 1368.50          |
| 293.15 | 1458.52              | 1466.11          |                | 1370.25          | 1359.45          |
| 295.65 | 1449.36              | 1457.94          |                | 1360.75          | 1350.38          |
| 298.15 | 1440.19              | 1449.80          | 1480.35        | 1351.22          | 1341.33          |
| 300.65 | 1431.11              | 1441.71          | 1472.33        | 1341.79          | 1332.35          |
| 303.15 | 1422.05              | 1433.65          | 1465.12        | 1332.39          | 1323.40          |
| 305.65 | 1412.98              | 1425.63          | 1457.52        | 1323.03          | 1314.49          |
| 308.15 | 1403.96              | 1417.62          | 1449.93        | 1313.71          | 1305.60          |
| 310.65 | 1394.97              | 1409.65          | 1442.36        | 1304.43          | 1296.79          |
| 313.15 | 1385.97              | 1401.71          | 1434.78        | 1295.20          | 1287.98          |
| 315.65 | 1377.01              | 1393.77          | 1427.21        | 1285.99          | 1279.20          |
| 318.15 | 1368.06              | 1385.85          | 1419.62        | 1276.84          | 1270.47          |
| 320.65 | 1359.11              | 1377.96          | 1412.08        | 1267.71          | 1261.76          |
| 323.15 | 1350.20              | 1370.05          | 1404.53        | 1258.63          | 1253.09          |
| 325.65 | 1341.29              | 1362.16          | 1396.99        | 1249.57          | 1244.45          |
| 328.15 | 1332.40              | 1354.28          | 1389.47        | 1240.54          | 1235.83          |
| 330.65 | 1323.54              | 1346.41          | 1382.03        | 1231.57          | 1227.24          |
| 333.15 | 1314.68              | 1338.54          | 1374.59        | 1222.57          | 1218.67          |
| 335.65 | 1305.85              | 1330.71          | 1367.20        | 1213.65          | 1210.19          |
| 338.15 | 1297.03              | 1322.85          | 1359.89        | 1204.74          | 1201.69          |

**Table 5.** Calculated isentropic compressibilities,  $\kappa_s$ , for the studied solvents.

| $T(K)$ | $\kappa_s$ (TPa <sup>-1</sup> ) |                  |                |                  |                  |
|--------|---------------------------------|------------------|----------------|------------------|------------------|
|        | 2-Furfuraldehyde                | Furfuryl alcohol | Levulinic acid | Ethyl levulinate | Butyl Levulinate |
| 278.15 | 371.28                          | 379.06           |                | 477.49           | 506.05           |
| 280.65 | 375.72                          | 383.20           |                | 483.97           | 513.81           |
| 283.15 | 380.35                          | 387.45           |                | 490.63           | 521.82           |
| 285.65 | 385.08                          | 391.76           |                | 497.46           | 529.99           |
| 288.15 | 389.88                          | 396.10           |                | 504.38           | 538.25           |
| 290.65 | 394.77                          | 400.53           |                | 511.41           | 546.72           |
| 293.15 | 399.71                          | 405.00           |                | 518.54           | 555.30           |
| 295.65 | 404.78                          | 409.55           |                | 525.81           | 564.08           |
| 298.15 | 409.95                          | 414.16           | 401.67         | 533.25           | 573.04           |
| 300.65 | 415.17                          | 418.82           | 406.83         | 540.77           | 582.14           |
| 303.15 | 420.48                          | 423.55           | 411.63         | 548.43           | 591.40           |
| 305.65 | 425.90                          | 428.32           | 416.72         | 556.22           | 600.84           |
| 308.15 | 431.39                          | 433.18           | 421.90         | 564.14           | 610.47           |
| 310.65 | 436.96                          | 438.09           | 427.15         | 572.19           | 620.24           |
| 313.15 | 442.66                          | 443.07           | 432.50         | 580.38           | 630.23           |
| 315.65 | 448.44                          | 448.13           | 437.94         | 588.72           | 640.41           |
| 318.15 | 454.32                          | 453.27           | 443.48         | 597.19           | 650.77           |
| 320.65 | 460.33                          | 458.47           | 449.09         | 605.82           | 661.34           |
| 323.15 | 466.42                          | 463.78           | 454.81         | 614.59           | 672.11           |
| 325.65 | 472.64                          | 469.17           | 460.62         | 623.54           | 683.09           |
| 328.15 | 478.97                          | 474.65           | 466.51         | 632.65           | 694.30           |
| 330.65 | 485.40                          | 480.21           | 472.46         | 641.90           | 705.73           |
| 333.15 | 491.97                          | 485.87           | 478.51         | 651.38           | 717.41           |
| 335.65 | 498.64                          | 491.61           | 484.64         | 660.99           | 729.24           |
| 338.15 | 505.45                          | 497.47           | 490.81         | 670.81           | 741.38           |

**Table 6.** Experimental surface tension data,  $\sigma$ , of studied green solvents.

| $T(K)$ | $\sigma$ (mN·m <sup>-1</sup> ) |                  |                |                  |                  |
|--------|--------------------------------|------------------|----------------|------------------|------------------|
|        | 2-Furfuraldehyde               | Furfuryl alcohol | Levulinic acid | Ethyl levulinate | Butyl Levulinate |

|        |       |       |       |       |       |
|--------|-------|-------|-------|-------|-------|
| 278.15 | 45.72 | 40.97 |       | 34.84 | 32.74 |
| 280.65 | 45.38 | 40.67 |       | 34.54 | 32.50 |
| 283.15 | 45.06 | 40.51 |       | 34.24 | 32.28 |
| 285.65 | 44.76 | 40.27 |       | 33.97 | 32.07 |
| 288.15 | 44.36 | 40.06 |       | 33.74 | 31.82 |
| 290.65 | 43.99 | 39.74 |       | 33.44 | 31.61 |
| 293.15 | 43.61 | 39.60 |       | 33.25 | 31.37 |
| 295.65 | 43.34 | 39.24 |       | 33.00 | 31.14 |
| 298.15 | 43.01 | 39.06 | 42.53 | 32.70 | 30.95 |
| 300.65 | 42.71 | 38.83 | 42.25 | 32.42 | 30.75 |
| 303.15 | 42.33 | 38.57 | 42.03 | 32.19 | 30.43 |
| 305.65 | 42.06 | 38.34 | 41.74 | 31.97 | 30.25 |
| 308.15 | 41.73 | 38.09 | 41.52 | 31.67 | 30.01 |
| 310.65 | 41.38 | 37.81 | 41.23 | 31.38 | 29.79 |
| 313.15 | 41.15 | 37.57 | 41.07 | 31.14 | 29.56 |
| 315.65 | 40.72 | 37.31 | 40.80 | 30.85 | 29.34 |
| 318.15 | 40.45 | 37.03 | 40.57 | 30.65 | 29.11 |
| 320.65 | 40.04 | 36.76 | 40.37 | 30.30 | 28.89 |
| 323.15 | 39.82 | 36.51 | 40.10 | 30.03 | 28.64 |
| 325.65 | 39.44 | 36.24 | 39.81 | 29.84 | 28.42 |
| 328.15 | 39.03 | 35.97 | 39.58 | 29.53 | 28.25 |
| 330.65 | 38.72 | 35.71 | 39.23 | 29.30 | 28.04 |
| 333.15 | 38.48 | 35.53 | 38.97 | 29.12 | 27.77 |

**Table 7.** Enthalpy of surface formation,  $\Delta H_{\sigma}$ , of studied green solvents.

| $T(K)$ | $\Delta H_{\sigma}$ , ( $mN \cdot m^{-1}$ ) |                  |                |                  |                  |
|--------|---------------------------------------------|------------------|----------------|------------------|------------------|
|        | 2-Furfuraldehyde                            | Furfuryl alcohol | Levulinic acid | Ethyl levulinate | Butyl Levulinate |
| 278.15 | 9.03                                        | 13.18            |                | 5.77             | 7.64             |
| 280.65 | 8.37                                        | 12.63            |                | 5.21             | 7.17             |
| 283.15 | 7.72                                        | 12.22            |                | 4.65             | 6.73             |

|        |       |       |       |       |       |
|--------|-------|-------|-------|-------|-------|
| 285.65 | 7.09  | 11.73 |       | 4.11  | 6.29  |
| 288.15 | 6.36  | 11.27 |       | 3.62  | 5.81  |
| 290.65 | 5.66  | 10.70 |       | 3.06  | 5.38  |
| 293.15 | 4.95  | 10.31 |       | 2.61  | 4.91  |
| 295.65 | 4.35  | 9.70  |       | 2.10  | 4.46  |
| 298.15 | 3.69  | 9.27  | 12.95 | 1.54  | 4.04  |
| 300.65 | 3.06  | 8.80  | 12.43 | 1.00  | 3.62  |
| 303.15 | 2.35  | 8.29  | 11.96 | 0.50  | 3.07  |
| 305.65 | 1.75  | 7.81  | 11.42 | 0.02  | 2.67  |
| 308.15 | 1.09  | 7.31  | 10.95 | -0.54 | 2.20  |
| 310.65 | 0.41  | 6.78  | 10.41 | -1.09 | 1.75  |
| 313.15 | -0.15 | 6.29  | 10.01 | -1.59 | 1.30  |
| 315.65 | -0.91 | 5.78  | 9.49  | -2.14 | 0.85  |
| 318.15 | -1.51 | 5.25  | 9.01  | -2.60 | 0.40  |
| 320.65 | -2.25 | 4.73  | 8.56  | -3.21 | -0.05 |
| 323.15 | -2.80 | 4.23  | 8.04  | -3.75 | -0.52 |
| 325.65 | -3.51 | 3.71  | 7.51  | -4.20 | -0.97 |
| 328.15 | -4.25 | 3.19  | 7.03  | -4.77 | -1.37 |
| 330.65 | -4.89 | 2.68  | 6.43  | -5.26 | -1.80 |
| 333.15 | -5.46 | 2.25  | 5.92  | -5.70 | -2.30 |

**Table 8.** Experimental dynamic viscosity data,  $\eta$ , of studied green solvents.

| $T(K)$ | $\eta$ (mPa·s)   |                  |                |                  |                  |
|--------|------------------|------------------|----------------|------------------|------------------|
|        | 2-Furfuraldehyde | Furfuryl alcohol | Levulinic acid | Ethyl levulinate | Butyl Levulinate |
| 278.15 | 2.1842           | 10.950           |                | 3.1004           | 4.2687           |
| 280.65 | 2.0707           | 9.8090           |                | 2.8983           | 3.9652           |
| 283.15 | 1.9646           | 8.8264           |                | 2.7176           | 3.6939           |
| 285.65 | 1.8672           | 7.9750           |                | 2.5566           | 3.4485           |
| 288.15 | 1.7778           | 7.2309           |                | 2.4061           | 3.2287           |
| 290.65 | 1.6943           | 6.5785           |                | 2.2709           | 3.0299           |

|        |        |        |         |        |        |
|--------|--------|--------|---------|--------|--------|
| 293.15 | 1.6177 | 6.0051 |         | 2.1458 | 2.8488 |
| 295.65 | 1.5471 | 5.4998 |         | 2.0342 | 2.6846 |
| 298.15 | 1.4818 | 5.0533 | 29.4429 | 1.9296 | 2.5350 |
| 300.65 | 1.4204 | 4.6542 | 25.9758 | 1.8340 | 2.3967 |
| 303.15 | 1.3639 | 4.2973 | 23.0030 | 1.7455 | 2.2707 |
| 305.65 | 1.3144 | 3.9802 | 20.4683 | 1.6673 | 2.1545 |
| 308.15 | 1.2621 | 3.6865 | 18.3161 | 1.5898 | 2.0472 |
| 310.65 | 1.2149 | 3.4307 | 16.4476 | 1.5262 | 1.9486 |
| 313.15 | 1.1711 | 3.1841 | 14.8235 | 1.4545 | 1.8572 |
| 315.65 | 1.1298 | 2.9741 | 13.4424 | 1.3925 | 1.7725 |
| 318.15 | 1.0910 | 2.7854 | 12.2335 | 1.3351 | 1.6945 |
| 320.65 | 1.0545 | 2.6232 | 11.1717 | 1.2815 | 1.6204 |
| 323.15 | 1.0200 | 2.4564 | 10.2315 | 1.2319 | 1.5523 |
| 325.65 | 0.9869 | 2.3144 | 9.4032  | 1.1855 | 1.4890 |
| 328.15 | 0.9564 | 2.1779 | 8.6758  | 1.1415 | 1.4299 |
| 330.65 | 0.9273 | 2.0671 | 8.0239  | 1.1003 | 1.3743 |
| 333.15 | 0.8999 | 1.9462 | 7.4377  | 1.0619 | 1.3245 |
| 335.65 | 0.8733 | 1.8432 | 6.9144  | 1.0251 | 1.2765 |
| 338.15 | 0.8479 | 1.7469 | 6.4319  | 0.9904 | 1.2314 |

**Table 9.** Experimental static permittivity data,  $\epsilon$ , of studied green solvents.

| $T(K)$ | $\epsilon$       |                  |                |                  |                  |
|--------|------------------|------------------|----------------|------------------|------------------|
|        | 2-Furfuraldehyde | Furfuryl alcohol | Levulinic acid | Ethyl levulinate | Butyl Levulinate |
| 278.15 | 47.142           | 19.396           |                | 13.890           | 11.097           |
| 280.65 | 46.605           | 19.194           |                | 13.758           | 11.023           |
| 283.15 | 45.929           | 18.875           |                | 13.645           | 10.923           |
| 285.65 | 45.207           | 18.591           |                | 13.519           | 10.830           |
| 288.15 | 44.495           | 18.34            |                | 13.399           | 10.720           |
| 290.65 | 43.814           | 18.075           |                | 13.258           | 10.620           |
| 293.15 | 43.144           | 17.673           |                | 13.126           | 10.526           |
| 295.65 | 42.479           | 17.357           |                | 12.979           | 10.435           |
| 298.15 | 41.799           | 17.035           | 19.081         | 12.852           | 10.344           |



|        |        |        |        |        |        |
|--------|--------|--------|--------|--------|--------|
| 300.65 | 41.198 | 16.736 | 18.984 | 12.690 | 10.240 |
| 303.15 | 40.545 | 16.415 | 18.889 | 12.550 | 10.164 |
| 305.65 | 39.866 | 15.989 | 18.786 | 12.416 | 10.083 |
| 308.15 | 39.198 | 15.664 | 18.690 | 12.255 | 9.998  |
| 310.65 | 38.535 | 15.339 | 18.580 | 12.117 | 9.885  |
| 313.15 | 37.861 | 15.019 | 18.458 | 11.996 | 9.776  |
| 315.65 | 37.237 | 14.715 | 18.335 | 11.853 | 9.681  |
| 318.15 | 36.641 | 14.423 | 18.226 | 11.738 | 9.581  |
| 320.65 | 35.972 | 14.143 | 18.123 | 11.586 | 9.522  |
| 323.15 | 35.306 | 13.878 | 18.022 | 11.437 | 9.419  |
| 325.65 | 34.644 | 13.599 | 17.908 | 11.319 | 9.325  |
| 328.15 | 34.083 | 13.342 | 17.806 | 11.187 | 9.235  |
| 330.65 | 33.461 | 13.055 | 17.677 | 11.032 | 9.102  |
| 333.15 | 32.756 | 12.711 | 17.582 | 10.901 | 9.042  |
| 335.65 | 32.052 | 12.333 | 17.474 | 10.768 | 8.940  |
| 338.15 | 31.348 | 12.027 | 17.366 | 10.670 | 8.848  |

**Table 10.** Experimental data of vapour pressure,  $p$ , of studied green solvents.

| $T(K)$ | $p$ (kPa)        |                  |                |                  |                  |
|--------|------------------|------------------|----------------|------------------|------------------|
|        | 2-Furfuraldehyde | Furfuryl alcohol | Levulinic acid | Ethyl levulinate | Butyl Levulinate |
| 303.15 | 0.385            |                  |                |                  |                  |
| 308.15 | 0.540            |                  |                |                  |                  |
| 313.15 | 0.750            |                  |                |                  |                  |
| 318.15 | 1.015            | 0.390            |                |                  |                  |
| 323.15 | 1.335            | 0.535            |                |                  |                  |
| 328.15 | 1.765            | 0.760            |                |                  |                  |
| 333.15 | 2.375            | 1.005            |                |                  |                  |
| 338.15 | 3.005            | 1.380            |                | 0.385            |                  |
| 343.15 | 3.905            | 1.795            |                | 0.545            |                  |
| 348.15 | 4.900            | 2.410            |                | 0.735            |                  |
| 353.15 | 6.175            | 3.090            |                | 0.995            |                  |
| 358.15 | 7.730            | 3.995            |                | 1.300            | 0.380            |

|        |        |        |       |        |       |
|--------|--------|--------|-------|--------|-------|
| 363.15 | 9.575  | 5.200  |       | 1.750  | 0.520 |
| 368.15 | 11.785 | 6.670  |       | 2.250  | 0.675 |
| 373.15 | 14.625 | 8.450  | 0.355 | 2.855  | 0.900 |
| 378.15 | 17.470 | 10.640 | 0.460 | 3.700  | 1.145 |
| 383.15 | 21.560 | 13.280 | 0.605 | 4.690  | 1.465 |
| 388.15 | 25.230 | 16.405 | 0.765 | 5.915  | 1.895 |
| 393.15 | 30.065 | 20.465 | 1.005 | 7.355  | 2.380 |
| 398.15 | 35.615 | 24.585 | 1.270 | 9.060  | 2.930 |
| 403.15 | 41.960 | 30.570 | 1.575 | 10.985 | 3.715 |
| 408.15 | 50.040 | 37.210 | 1.955 | 13.415 | 4.480 |
| 413.15 | 58.220 | 44.250 | 2.465 | 16.550 | 5.480 |
| 418.15 | 66.640 | 53.135 | 3.060 | 19.705 | 6.660 |
| 423.15 | 78.220 | 63.650 | 3.805 | 23.930 | 8.050 |
| 428.15 | 88.900 | 75.920 | 4.645 | 28.505 | 9.805 |

**Table 10.** Continuation

| <i>p</i> (kPa) |                  |                  |                |                  |                  |
|----------------|------------------|------------------|----------------|------------------|------------------|
| <i>T</i> (K)   | 2-Furfuraldehyde | Furfuryl alcohol | Levulinic acid | Ethyl levulinate | Butyl Levulinate |
| 433.15         |                  | 91.025           | 5.700          | 34.070           | 11.715           |
| 438.15         |                  |                  | 6.975          | 39.610           | 13.905           |
| 443.15         |                  |                  | 8.500          | 46.580           | 16.235           |
| 448.15         |                  |                  | 10.310         | 55.090           | 19.425           |
| 453.15         |                  |                  | 12.405         |                  | 22.470           |
